## Shared and specific signatures of locomotor ataxia in mutant mice

*Ana S. Machado, Hugo G. Marques, Diogo F. Duarte, Dana M. Darmohray, and Megan R. Carey\**

Champalimaud Neuroscience Program,  
Champalimaud Center for the Unknown,  
Lisbon, Portugal

### \* Correspondence

Megan R. Carey, PhD  
[megan.carey@neuro.fchampalimaud.org](mailto:megan.carey@neuro.fchampalimaud.org)  
[@meganinlisbon](#)

## Abstract

Several spontaneous mouse mutants with deficits in motor coordination and associated cerebellar neuropathology have been described. Intriguingly, both visible gait alterations and neuroanatomical abnormalities differ across mutants. We recently quantified specific deficits in locomotor coordination in mildly ataxic *Purkinje cell degeneration* mice (*pcd*). Here, we analyze the locomotor behavior of severely ataxic *reeler* mutants. Despite clearly visible behavioral differences, we find that on average, affected features of locomotor coordination are generally similarly perturbed in the two mutants. Direct comparison of locomotor kinematics and linear discriminant analysis reveal that differences in the locomotor phenotypes of these two lines are largely attributable to additional hindlimb abnormalities and increased movement variability in *reeler*. These findings capture shared and specific signatures of gait ataxia across mutants and provide a quantitative foundation for mapping specific locomotor impairments onto distinct neuropathologies.

## Introduction

Visibly ataxic mouse mutants exhibit varying patterns of neuropathology throughout the brain (Cendelin, 2014; Fortier et al., 1987; Goldowitz et al., 1997; Lalonde and Strazielle, 2007; Lalonde and Strazielle, 2019; Mullen et al., 1976; Walter et al., 2006). Although their motor coordination deficits are generally attributed to abnormal cell patterning within the cerebellum (Arshavsky et al., 2013; Orlovsky et al., 1999), these lines have distinct patterning defects within the cerebellum, varying degrees of extracerebellar involvement, and differences in age of onset (Cendelin, 2014; Lalonde and Strazielle, 2019). The nature of the motor deficits exhibited by these mice also vary, and can often be distinguished by trained observers (Berman, 2018; Brooks and Dunnett, 2009; Hoogland et al., 2015; Lalonde and Strazielle, 2019; Schiffmann et al., 1999; Stroobants et al., 2013; Van Alphen et al., 2002; Vinueza et al., 2014). However, analysis of motor coordination is often limited to low dimensional descriptions of limited specificity that fail to distinguish between related behavioral phenotypes (Brooks and Dunnett, 2009; Lalonde and Strazielle, 2019). Analysis of locomotor kinematics can provide higher dimensional readouts of locomotor behavior (Cendelin et al., 2010; Gabriel et al., 2009; Zörner et al., 2010), but can suffer from a lack of specificity due to an abundance of highly correlated measures that ultimately reflect non-specific features such as changes in walking speed or body size (Batka et al., 2014; Cendelin et al., 2010; Machado et al., 2015). A quantitative understanding of the specific nature of gait ataxia in mutants with well-described abnormalities in circuit architecture could provide important clues into neural mechanisms of motor coordination (Anderson and Pietro, 2014; Bastian et al., 1996; Berman, 2018; Brown and de Bivort, 2018; Darmohray et al., 2019; Datta et al., 2019; Kiehn, 2016; Morton and Bastian, 2007; Powell et al., 2015; Sarnaik and Raman, 2018)

We previously used the LocoMouse system (Machado et al., 2015) to analyze the locomotor coordination of mildly ataxic *Purkinje cell degeneration* (*pcd*) mice, in which neural degeneration, particularly early in postnatal development, is largely restricted to cerebellar Purkinje cells (Chen et al., 1996; Fernandez-Gonzalez et al., 2002; Le Marec and Lalonde, 1997). We found that locomotor deficits in *pcd* were restricted to specific aspects of multijoint, interlimb, and whole-body coordination, while the forward trajectories of individual paws were spared (Machado et al., 2015).

*Reeler* mice are a classic ataxic mutant (Cendelin, 2014; Curran and D'Arcangelo, 1998; D'Arcangelo et al., 1999; D'Arcangelo et al., 1995; Falconer, 1951) with an autosomal recessive mutation in the *reelin* gene, which is important for neural cell migration (Beckers et al., 1994; Hack et al., 2002). Its loss causes several defects, in particular aberrant localization of neurons and failure of neuronal layer formation. Several brain regions are affected, including cerebellum (Hamburgh, 1963; Terashima et al., 1983), hippocampus (Stanfield et al., 1979), neocortex (Mikoshiba et al., 1980), inferior olive (Blatt and Eisenman, 1988) and substantia nigra (Kang et al., 2010). Neuropathology in these mice is particularly striking within the cerebellum, where severe irregularities in cellular localization are also associated with corresponding aberrant synaptic connectivity between cell types, abnormal foliation, and hypoplasia. Behaviorally, homozygous *reeler* mutants are characterized by a severely ataxic, "reeling" gait, with

difficulties in maintaining their hindquarters upright (Cendelin, 2014; Lalonde et al., 2004a; Lalonde and Strazielle, 2019). Like most ataxic mutants, *reelers* also exhibit poor performance in rotarod, stationary beam and water maze tests (Lalonde et al., 2004).

Here we analyze the locomotor behavior of *reeler* mutants and compare it to that of the more mildly ataxic *pcd* mice (Machado et al., 2015). Detailed comparison of locomotor kinematics and linear discriminant analysis reveals both shared and distinct features of gait ataxia in these mutants with cerebellar dysfunction. These findings highlight specific impairments in multijoint, interlimb, and whole-body coordination as fundamental features of ataxia and provide a quantitative foundation for mapping specific locomotor impairments onto distinct alterations in underlying neural circuits.

## Results

### **Reeler mice have impaired hindlimb control and exhibit increased variability of movement**

*Reeler* mice exhibited visible and severe gait ataxia when walking on the LocoMouse setup (Movie 1). Like *pcd* mice (Machado et al., 2015), *reelers* were smaller and walked more slowly than control littermates (Methods; Fig. 1D). However, the locomotor phenotypes of *reeler* and *pcd* mice were clearly distinguishable by eye, with *reeler* mice appearing much more severely ataxic than the mildly ataxic *pcd* mice (Movie 1) (Lalonde and Strazielle, 2007; Lalonde and Strazielle, 2019; Machado et al., 2015).

We analyzed the locomotor phenotype of *reeler* mice using the quantitative framework for locomotor coordination that we established previously (Figure 1A-C; Machado et al., 2015). First, the equations we previously generated with mixed-effects linear models (Machado et al., 2015) to predict stride parameters based on walking speed and body size were able to accurately predict the individual stride parameters (including stride length, cadence, stance duration) of *reeler* mice (Fig. 1. E-G), as we had previously shown for *pcd* (Machado et al., 2015). Moreover, the continuous forward trajectories of *reeler* front paws were similar to those of size-matched controls, across walking speeds (Fig. 1H, top). Notably, the forward trajectories of *reeler* hind paws exhibited lower forward velocities compared to size and speed-matched controls (Fig. 1H, bottom), and they had accompanying increases in swing duration (from size-matched controls=98.78±6.48 ms to *reeler*=114.72±8.21 ms). Comparison of 3D trajectories revealed clear differences between *reeler* and control mice in both the side-to-side and the vertical paw movements of both front and hind paws (Fig. 1 I-K). Finally, and perhaps surprisingly given their severe ataxia, *reeler* mice did not exhibit an increased width of base of support (Fig. 1K).

Direct comparison of average paw kinematics in the two mutants reveals remarkable similarities (Fig. 1 – Supp. 1). Both *reeler* and *pcd* exhibited altered 3D trajectories of all paws when compared to those of speed and size-matched controls (Fig. 1 – Supp. 1E-G). In particular, the off-axis (side-to-side and vertical) movements of all paws showed nearly identical alterations in the two mutants (Fig. 1 – Supp. 1F,G). In addition, forward hind paw trajectories were profoundly affected in *reelers*, while more subtle effects were seen on the forward movement of the front paws (Fig. 1 – Supp. 1 B-E).

In contrast to the broad similarities in *averaged* paw trajectories, there were clear differences in the *variability* of paw kinematics between *reeler* and *pcd* (Fig. 1 – Supp 1H,I). Despite their ataxia, neither the front nor hind limb trajectories of *pcd* mice exhibited increased variability (Fig. 1 - Supp. 1H; Machado et al., 2015). Paw movement was generally more variable in *reeler*, including the forward motion of the hind paws (Fig. 1 – Supp. 1H-bottom) and the vertical movements of both front and hind paws (Fig. 1 – Supp. 1I-top and bottom).

### **Impaired interlimb coordination and increased front paw support in *Reeler***

Mice typically walk in a symmetrical trot pattern across a wide range of walking speeds (Fig. 2A) (Machado et al., 2015). The normal pattern of interlimb coordination was markedly disrupted in *reeler*, due to specific and consistent changes in the phase relationship between front and hind limbs (Fig. 2 B-C). Remarkably, the alterations in front-hind limb stance phasing in *reelers* were identical on average to those

of *pcd* mice; in both mutants, hind paw touch downs were delayed relative to their diagonal partners (Fig. 2B,C; (Machado et al., 2015). In contrast, relative left-right stance phasing of both the front and hind limbs was intact in both *reelers* and *pcd* (Fig. 2D) (Machado et al., 2015). Consistent with the increased variability of hind limb movements, the front-hind limb phasing was more variable on average in *reeler*, but not *pcd* (size-matched controls=0.25±0.05%, *pcd*=0.29±0.09%  $F_{1,82}=1.02$ ,  $p=0.32$ , *reeler*=0.48±0.11%  $F_{1,82}=5.79$ , \*\* $p=9.5 \times 10^{-3}$ ), and left-right phasing was not more variable in either mutant (size-matched controls=0.25±0.06%, *pcd*=0.19±0.07%  $F_{1,54}=0.23$ ,  $p=0.63$ , *reeler*=0.22±0.07%,  $F_{1,74}=0.11$ ,  $p=0.75$ ).

We also observed changes in support patterns (ie, the configuration of paws that are in stance at any given time, Gorska et al., 1998) in *reeler* mice. At most natural walking speeds, wildtype mice typically have a single diagonal pair of paws on the ground at any given time (Machado et al., 2015). *Reeler* mice exhibited an increase in 3-paw support patterns (Fig. 2E). They also spent more time in unstable support configurations such as non-diagonal 2-paw support (Fig. 2F) and 2-front paw supports (Fig. 2G). This increased instability was also observed in *pcd* (Machado et al., 2015) and is consistent with impaired interlimb coordination rather than a simple switch to a different gait pattern (Bellardita and Kiehn, 2015).

Although the alterations in interlimb coordination were similar in *reeler* and *pcd*, there were some notable differences between the two mutants. In particular, *reeler* mice spent more time with both front paws on the ground than both controls and *pcd*, either as sole supports (Fig. 2G), or as part of a 3 or 4 paw support configuration (Fig. 2H). Interestingly, *reelers* also spent less time with both hind paws on the ground than *pcd* or control mice (Fig. 2I). The ratio of front to hind paw double support was higher in *reeler* (front/hind=0.43) than in *pcd* (front/hind=0.14) and control mice (front/hind=0.10). This decreased hind paw double support is likely to be a consequence of the impaired hindlimb control described in Fig. 1 and Fig. 1 – Supp. 1.

#### **Impaired whole-body coordination in *reeler* reflects passive consequences of front paw motion**

Like *pcd* (Machado et al., 2015), *reeler* mice exhibited large side-to-side oscillations of the tail and nose with respect to the stride cycle (Fig. 3A-F, green) when compared to controls (black). Also like *pcd*, both tail (Fig. 3A,C) and nose (Fig. 3D,F) movements became increasingly phase-lagged relative to the locomotor cycle at faster speeds.

We previously showed that the tail and nose movements of *pcd* mice could be successfully modelled as a passive consequence of hind limb movement (Machado et al., 2015). A model that converted hindlimb oscillation into nose and tail trajectories using solely the geometric relationships between body parts moving with fixed time delays accurately predicted the side-to-side tail and nose movements of *pcd* mice across walking speeds.

At first glance, the similarities in averaged tail trajectories suggest that the *reeler* tail and nose movements, like *pcd*, might also reflect passive consequences of limb movement during locomotion. However, the specific phase relationships of both the tail and nose with respect to the locomotor cycle were dramatically different in *reeler* compared to *pcd* (Fig. 3B,E). We wondered whether these phase differences could be accounted for by the shift in support patterns towards the front limbs in *reelers* (Fig. 2F-H). To our surprise, simply aligning the *reeler* tail oscillations to the front limbs, rather than hind limbs (Fig. 3C), immediately revealed that the phase relationship between the *reeler* tail and the **front** limbs was nearly identical to that of the *pcd* tail to the **hind** limbs (Fig. 3C). In other words, the tail movements of *reeler* mice have the same quantitative relationship to front limb movement that the *pcd* tail had to the hind limbs.

Nose trajectories in *reeler* were similarly pronounced, but also phase-shifted, compared to those of *pcd* (Fig. 3D,E). Side-to-side nose movements in *reeler* were almost perfectly out of phase with the base of the tail (Fig. 3F), suggesting that both the tail and nose movements of *reeler* mice oscillate along a single, straight body axis with each stride (Fig. 3G). One possible explanation for the differences in relative tail and nose phasing between *pcd* and *reeler* (Fig. 3E) is that the shift of supports to front paws leads to the loss of a front-limb steering component in *reeler* (Fig. 3G). Consistent with this idea, *reelers*, but not *pcd*, exhibited larger side-to-side movements of the body center while walking (Fig. 3H, Movie 1).

To test the idea that the nose and tail movements of *reeler* mice might reflect the passive consequence of front, rather than hind, limb movement, we built an analytical model that computed predicted lateral trajectories of the tail and nose directly from the forward-backward oscillations of the front limbs (Fig.3J; Methods). The model and its parameters were analogous to the geometrical model described in (Machado et al., 2015), but with a shift to the front limbs and a single body axis for *reeler* (see Methods). The model output accurately reproduced the phases as well as the actual trajectories of the tail and nose of *reeler* mice, across a range of walking speeds (Fig. 3J and Fig. 3 – Supp. 1).

Thus, in *reeler*, like *pcd*, the tail and nose appear to move as a passive consequence of forward limb motion. The altered phasing in the two mutants suggests that the shift in the support patterns towards the front paws in *reeler* (Fig. 2, and presumably resulting from impaired hindlimb control shown in Fig. 1) causes the tail and body axis to oscillate as a passive consequence of the front, rather than hind limbs.

### **Linear discriminant analysis reveals shared and specific features of gait ataxia**

The results so far have described a comprehensive set of locomotor features and highlighted similarities and differences between *reeler* and *pcd* mice. Finally, we sought an unbiased way to summarize and conceptualize these findings (Brown and de Bivort, 2018; Berman, 2018; Datta et al., 2019). To do this we turned to linear discriminant analysis (LDA; Fisher, 1936; James et al., 2013), which quantitatively distinguishes the three groups of mice (wildtype, *pcd* and *reeler*; Fig. 4).

Forty-five variables representing the various features of paw, nose, and tail movements that we measured during locomotion were extracted for this analysis. Because this relatively high-dimensional dataset contained many highly correlated variables (Fig. 4 – Fig. Supp. 1A), we first applied principal component analysis (PCA) to account for inter-variable correlations and avoid overfitting (see Methods, Fig. 4 – Fig. Supp. 1B-F).

LDA successfully captured meaningful differences in an abstract feature subspace to separate the three genotypes based on their locomotor phenotypes (Fig. 4). This analysis revealed two distinct axes – one that effectively separated controls from mutants (LD1), and a second that separated the two cerebellar mutants from each other (LD2) (Fig. 4). The locomotor features contributing most strongly to these two linear discriminants thus correspond to the shared (LD1) and distinct (LD2) features of ataxia in *reeler* and *pcd* mice.

Inspection of the contributions of each gait parameter to the two LDs reveals that LD1, which separates controls from ataxic mutants, is highly influenced by variables representing 3D paw trajectories and interlimb and whole-body coordination (Fig. 4, x-axis bar graph). The features contributing most strongly to LD2, which captured the differences in locomotor phenotype between the two mutants, included measurements of hindpaw movement (and subsequent changes in support patterns), variability, and relative phase of tail/nose movements (Fig. 4, y-axis bar graph). Most variables relating to the averaged forward motion of individual limbs, which are largely spared in both mutants, do not strongly influence either LD.

The LDA provides a quantitative summary that captures the essential elements of the similarities and differences in locomotor behavior across groups of mice. In so doing, it shows that a high-dimensional set of gait parameters contains a subspace of mixed features in which multiple neuropathologies are represented behaviorally. The results, together with our previous description of the locomotor phenotype of *pcd* mice (Machado et al., 2015), reveal multijoint, interlimb, and whole-body coordination as fundamental, shared features of gait ataxia.

## **Discussion**

Here we used the LocoMouse system to analyze the locomotor behavior of severely ataxic *reeler* mice and compare and contrast it with that of *Purkinje cell degeneration* mutants (Machado et al., 2015). Detailed comparison of locomotor kinematics and linear discriminant analysis revealed both shared and

distinct features of gait ataxia in the two mutants. Despite the well-described and clearly visible differences in gait phenotype in these two lines, we find: 1) On average, locomotor features are generally similarly affected in *reeler* and *pcd*. 2) The gait differences between the two lines are generally attributable to additional hindlimb abnormalities and increased movement variability in *reeler*. 3) Both mutants display dramatic deficits in multi-joint, interlimb, and whole-body coordination. By highlighting both core and specific signatures of gait ataxia across mutants, these findings provide novel insights into fundamental features of ataxia and establish a conceptual framework for mapping specific movement features onto underlying differences in neural circuits.

Our first finding lies in capturing specific quantitative differences in gait ataxia between *pcd* and *reeler* mice. These include an increase in movement variability and additional hindlimb involvement (Cendelin, 2014) in *reeler* mice. As a likely consequence of those deficits, analysis of support patterns and nose and tail movements suggests that *reelers*, unlike controls and *pcd*, use their front paws as their main supports while walking. This difference in support patterns fully accounts for differences in tail movements observed in the two mutants (Fig. 3). It could also account for the inability of *reelers* to walk in a straight line (Movie 1, Fig. 3H), likely because the front limbs are unable to provide both support and steering control to keep the body moving forward.

Differences in underlying neuropathology can explain the differences in gait phenotypes between *pcd* and *reeler*. In *pcd*, the main anatomical phenotype is cerebellar, with striking degeneration of Purkinje cells that occurs postnatally and effectively removes cerebellar cortical input to the cerebellar nuclei. In contrast, *reeler* mice exhibit aberrant cell localization throughout the brain (Terashima et al., 1983; Stanfield et al., 1979; Mikoshiba et al., 1980; Blatt and Eisenman, 1988; Kang et al., 2010). However, the cerebellum is particularly affected in *reeler*, where abnormal cell migration during development results in aberrant circuit wiring that alters, rather than removes, Purkinje cell activity (Curran and D'Arcangelo, 1998; D'Arcangelo et al., 1995; Lalonde and Strazielle, 2019). Aberrant Purkinje cell output in *reeler* mice likely accounts for their increased movement variability (Van Alphen et al., 2002; Walter et al., 2006). The difference between this aberrant output and the lack of Purkinje cell output in *pcd* could account for the difference in variability between the two mutants. Intriguingly, it could also explain our previous finding that *pcd* mice were *less* variable than controls on several movement measures (Machado et al., 2015). Differences in hindlimb involvement could be extracerebellar, and/or result from differences in the developmental progression of the neuropathology in *pcd* and *reeler*.

Despite the more severe behavioral and anatomical phenotype in *reeler*, we found the overall pattern of affected locomotor features in *pcd* and *reeler* to be surprisingly similar. It is tempting to speculate that these remarkable similarities reveal core features of cerebellar ataxia. In particular, like *pcd* (Machado et al., 2015), the tail and nose movements of *reelers* were also successfully modeled as passive consequences of limb movement, with a shift of supports to the front, rather than hind, paws. We had previously interpreted the pattern of coordination deficits in *pcd* mice, and particularly the passive tail oscillation, as consistent with the lack of an internal forward model that predicts and compensates for the consequences of movement (Bastian et al., 1996; Ebner and Pasalar, 2008; Ito, 2008; Kennedy et al., 2014; Wolpert et al., 1998). Specifically for locomotor control, a forward model can predict how the movement of one part of the body (e.g., a limb or a paw) will affect the movement of another part (e.g., another limb, or the tail), and inject a compensatory control signal to eliminate those consequences. The idea that the cerebellum could provide a forward model for motor control is often invoked when considering the role of the cerebellum in motor learning (Ito, 2008; Shadmehr and Krakauer, 2008; Wolpert et al., 1998). Recently, we showed that both *pcd* and *reeler* mice were unable to learn to restore gait symmetry on a locomotor learning task that requires predictive control (Darmohray et al., 2019; Morton and Bastian, 2006; Reisman et al., 2005). That finding, together with the passive tail oscillations of both mutants, reinforces the idea that these animals lack the predictive mechanism, provided by an intact cerebellum, that compensates unintended movements during locomotion. The consistent lack of compensatory predictive mechanisms across mutants and behavioral paradigms suggests that they may represent core features of cerebellar contributions to coordinated locomotion.

When assessing motor coordination deficits in mice there is often a tradeoff between specificity and interpretability. For example, approaches such as rotarod testing provide measurable and intuitive low

dimensional outputs, but lack specificity. Others, such as the CatWalk system (Gabriel et al., 2009) can provide many detailed measurements of locomotor behavior, but their meaning is not always readily apparent. With LocoMouse we have tried to provide both a comprehensive quantitative description of locomotor behavior as well as a conceptual framework within which to interpret that high-dimensional data. Analyzing the distinct patterns of deficits associated with differing neuropathologies allows us to capture shared and specific features of gait ataxia that can yield insights into the fundamental contributions of the affected neural circuitry. Applying a similar approach across a broad range of circuit manipulations could become a key element in understanding how various neural components work together to control complex, whole-body behaviors.

## Materials and methods

### ANIMALS

All procedures were reviewed and performed in accordance with the Champalimad Centre for the Unknown Ethics Committee guidelines and approved by the Portuguese Direção Geral de Veterinária (Ref. No. 0421/000/000/2015).

Heterozygous *reeler* (Reln<sup>rl</sup>) mice on a C57BL/6 background were obtained from Jackson labs (#000235 B6C3Fe a/a-Reln<sup>rl</sup>/J). Data were collected from homozygous *reeler* mice (n=9392; N=7 mice; 2 females; 5 males; 8-18g; 35-52 days old; average weight=13.57±3.3g) and their littermates (n=9524; N=12 mice; 8 females, 4 males; 12-25 g; 36-52 days old; average weight=18.67±3.5g). Data from *Purkinje cell degeneration* mice (#0537 B6.BRAGtpbp1<sup>pcd</sup>/J) and additional wildtype C57BL/6 (Jackson #000664) mice used for size-matching was previously collected and described in (Machado et al., 2015). Mice were housed on a reversed light cycle 12-hr light/12-hr dark cycle, in standard cages with no more than 5 animals per cage. They had access to water and food ad libitum.

### EXPERIMENTAL PROCEDURES

#### LocoMouse overground walking setup

The LocoMouse system for overground locomotion was composed by a glass corridor, 66.5 cm long and 4.5 cm wide with a mirror placed at 45 deg under the corridor. A single high-speed camera (AVT Bonito, 1440x250 pixels, 400 frames per second) recorded both bottom and side views of walking mice. Infrared sensors were used to automatically detect when mice entered and exited the corridor and trigger data collection, which was performed in LABVIEW 2012 (Machado et al., 2015).

#### Data collection

Animals were handled and acclimated to the overground setup for several sessions before data collection. Individual trials consisted of single crossings of the corridor, in which mice walked freely between two dark boxes. No food or water restriction or reward was used. Ten to twenty-five corridor trials were collected in each session for five consecutive days. An average of 1342 ± 637 strides were collected per *reeler* mouse (348 ± 116 strides per paw) and 635± 341 strides per littermate mouse (162 ± 86 strides per animal per paw) were collected.

To track the paws, nose and tail of locomoting mice we used the previously described noninvasive, markerless LocoMouse tracking system (Machado et al., 2015; <https://github.com/careylab/LocoMouse>), with additional, subsequent updates to the tail tracking, in order to handle the more erratic tail movements of the *reeler* mice, which often left the field of view of the videos. The new tail tracking algorithm was implemented using Matlab and the Signal Processing, Image Processing and Statistics and Machine Learning toolboxes. Tail tracking started with the side view using binary thresholding followed by a skeletonization operation for finding candidate tail segments based on length and position. These points were then projected onto the bottom view starting from the distal tail segment. The bottom view image was convoluted with a hamming window with a kernel width representative of a mouse tail. Subsequent points were identified iteratively towards the proximal tail, stopping at the base of the tail. In the case of tail segmentation after skeletonization the additional step of looking for tail points towards the distal tail was taken. The tail was then divided into 15 tail points (referred to as segments) with constant Euclidian distance (in 3D) between them, similarly to (Machado et al. 2015). Matlab code for the updated tail tracker is available at [https://github.com/careylab/LocoMouse\\_Dev](https://github.com/careylab/LocoMouse_Dev).

### DATA ANALYSIS AND STATISTICS

Matlab 2012b and 2015a were used to process and analyze the data. Paw, nose and tail tracks (x,y,z) were obtained from the LocoMouse tracker (Machado et al., 2015). All tracks were divided in strides cycles. Stride cycle was defined as the period from stance onset to subsequent stance onset. For each stride, average walking speed was calculated. All data was sorted into speed bins (0.05 m/s bin width). Individual limb movements and interlimb coordination were calculated as follows:

#### Individual limb parameters

Walking speed: x displacement of the body center during that stride divided by the stride duration

Stride duration: time between two consecutive stance onsets

Cadence: inverse of stride duration

Swing velocity: x displacement of single limb during swing phase divided by swing duration

Stride length: x displacement from touchdown to touchdown of single limb

Stance duration: time in milliseconds that foot is on the ground during stride

Duty factor: stance duration divided by stride duration



**Trajectories:** (x,y,z) trajectories were aligned to swing onset and resampled to 100 equidistant points using linear interpolation. Interpolated trajectories were then binned by speed and the average trajectory was computed for each individual animal and smoothed with a Savitzky-Golay first-order filter with a 3-point window size.

**Instantaneous swing velocity:** the derivative of swing trajectory

**Model predictions:** equations that were previously generated with mixed-effects models (Machado et al., 2015) to predict basic stride parameters.

### **Interlimb and whole-body coordination parameters**

**Base of support:** width between the two front and two hind paws during stance phase

**Body y displacement:** y displacement of the body center during that stride

**Stance phase:** relative timing of limb touchdowns to stride cycle of reference paw (FR). Calculated as:  $\text{stance time} - \text{stance time}_{\text{reference paw}} / \text{stride duration}$

**Supports:** Support types were categorized by how many and which paws were on the ground, expressed as a percentage of the total stride duration for each stride. Paw support categories include 3-paw, 2-paw diagonal, 2-paw other/ non-diagonal (homolateral and homologous), and 2-paw front (only) supports.

**Double support** for each limb is defined as the percentage of the stride cycle between the touch down of a reference paw to lift-off of the contralateral paw. Because at higher speeds (running), the opposing limb lifts off before the reference paw touches down, we included negative double support by looking backwards in time, up to 25% of the stride cycle duration. Positive values of double support indicate that contralateral lift-off occurred after reference paw touch down, and negative values indicate that contralateral lift-off occurred before reference paw touch down. Note that front paw double support percentages include 2-paw front (only) support patterns as well as 3 and 4-paw support patterns in which both front paws were on the ground.

**Tail and nose phases:** For each speed bin we correlate the stridewise tail and nose trajectories with the trajectory given by the difference between the forward position of the right paw and the forward position of the left paw (also normalized to the stride). We do this both for front limbs (for the analysis of *reeler* mice) and hind limbs (for the analysis of previous *pcd* data). The phase is then calculated by the delay in which this correlation is maximized.

**Tail and nose peak-to-peak amplitude:** the change between peak (highest amplitude value) and trough (lowest amplitude value) in y or z during a stride duration

**Variability:** All variability analyses were based on coefficients of variation (CV).

### **Geometric model of the tail and nose**

The analytical model of the nose and tail was a simpler version of our previously described geometric model (Machado et al., 2015). The current model transforms the forward movements of the front limbs into predicted lateral oscillations of tail and nose. The model is described by the equation

$$y^s_t = G^s (x^r_{t-Ds} - x^l_{t-Ds}) \text{ and } y^n_t = G^n (x^l_{t-Dn} - x^r_{t-Dn})$$

where  $y^s_t$  and  $y^n_t$  are the lateral positions of tail segment  $s$  and nose, respectively;  $G^s$  and  $G^n$  are gains, obtained from fitting the data, that transform the limb oscillation amplitude to the amplitude of tail segment  $s$  and nose movements, respectively;  $x^r_t$  and  $x^l_t$  are the positions of front right and front left limbs at time  $t$  obtained from average trajectories of limb movements during strides at different speeds.  $Ds$  and  $Dn$  are the delays of tail segment  $s$  and nose, where the delay  $D1$  is the delay of the base of the tail obtained by fitting the data.

As in (Machado et al., 2015), delays between subsequent tail segments decreased according to the equation

$$Ds = -0.23 * s + 3.97$$

where  $s$  is the segment number, starting at the base of the tail. The delay of the nose was the same as the delay of the base of the tail (e.g.  $Dn = D1$ ).

### **Principal component and linear discriminant analyses**

The dataset consisted of a matrix of 109 observations of 45 features. Each observation was data from one mouse locomoting at a certain speed (binned) and features are z-scored gait parameters. LDA assumes independence within the feature space, which we knew to be violated due to the high speed-dependence of many gait features (Machado et al., 2015). Therefore, PCA was applied to address inter-variable correlation and avoid overfitting in LDA. PCA was performed by eigenvalue decomposition of the data covariance matrix. The first 10 PCs explained 88% of the variance and the data projected onto these 10 PCs was used as input to the LDA. The end contributions of the initial gait parameters to the two LD axes were obtained by multiplying the PCA mapping by the LDA mapping.

### **Statistical analyses**

All statistics can be found in Table S1. Statistical analyses were done in Matlab with the Statistics toolbox. An independent samples t-test was used to test for differences in walking speed distributions (Fig. 1D and Fig. 1 –

Supp.1A). For all other gait parameters, analysis was performed on animal averages binned by speed using mixed-effects models (Bates et al., 2013). Fixed-effects terms included speed and genotype; animals were included as random terms. We report F statistics from mixed ANOVAs with Satterthwaite degrees of freedom correction. Differences were considered significant at \* $p < 0.05$ , \*\* $p < 0.01$ , and \*\*\* $p < 0.001$ ; asterisks report main effects of genotype.

### **Movie 1: Visible gait ataxia in *reeler* and *Purkinje cell degeneration* mice walking on the LocoMouse setup.**

Wild type (top), *reeler* (middle), and *pcd* (bottom) mice were recorded walking across the glass corridor of the LocoMouse setup. Side and bottom (via mirror reflection) views were captured by a single high-speed camera at 400fps and are shown here at 50 fps (slowed down 8x). Note the slower walking speeds of both mutants and the visible differences in their locomotor behavior.

### **Author contributions**

Conceptualization and Design, MRC, ASM, DMD, HGM, and DFD; Conducting experiments, ASM; Data analysis, ASM, HGM, DFD, DMD, MRC; Writing, Reviewing and Editing, MRC, ASM, HGM, DFD, DMD; Supervision, MRC; Project Administration, MRC; Funding Acquisition, MRC.

### **Acknowledgements**

We thank Tracy Pritchett for maintenance of mouse lines and help with histology and imaging and João Fayad for optimization and maintenance of the LocoMouse tracker. Olivia Carmo assisted with data acquisition and Alex Azinheira made the movie. We are grateful to the members of Carey Lab and the Champalimaud Neuroscience Program for helpful discussion.

This work was supported by a Howard Hughes Medical Institute International Early Career Scientist Grant #55007413 (to MRC), European Research Council Starting Grant #640093 (to MRC), FCT grant FCT-PTDC/MED-NEU/30890/2017 (to MRC), Congento LISBOA-01-0145-FEDER-022170, and fellowships from the Portuguese Fundação para a Ciência e a Tecnologia: SFRH/BD/51210/2010 (to ASM), SFRH/BD/86265/2012 (to DMD), PD/BD/141643/2018 (to DFD), and SFRH/BPD/119404/2016 (to HGM).

### **Competing interests**

The authors declare no competing interests.

## References

- Anderson, D.J., and Pietro, P. (2014). Toward a Science of Computational Ethology. *Perspective Neuron* 84,18-31.
- Armstrong, D.M., and Edgley, S.A. (1984). Discharges of Purkinje cells in the paravermal part of the cerebellar anterior lobe during locomotion in the cat. *J Physiol* 352, 403-424.
- Arshavsky, Y.I., Gelfand, I.M., and Orlovsky, G.N. (2013). The cerebellum and control of rhythmical movements. *Trends Neurosci* 6, 417-422.
- Bastian, A.J., Martin, T.A., Keating, J.G., and Thach, W.T. (1996). Cerebellar ataxia: abnormal control of interaction torques across multiple joints. *J Neurophysiol* 76, 492-509.
- Bates, D., Maechler, M., Bolker, B., and Walker, S. (2013). lme Linear mixed-effects models using Eigen and S4. R package version 1.0-5.
- Batka, R.J., Brown, T.J., McMillan, K.P., Meadows, R.M., Jones, K.J., and Haulcomb, M.M. (2014). The Need for Speed in Rodent Locomotion Analyses. *Anat Rec nana*
- Beckers, M.C., Bar, I., Huynh-Thu, T., Deroncourt, C., Brunialti, A.L., Montagutelli, X., Guenet, J.L., and Goffinet, A.M. (1994). A high-resolution genetic map of mouse chromosome 5 encompassing the reeler (rl) locus. *Genomics* 23.
- Bellardita, C., and Kiehn, O. (2015). Phenotypic characterization of speed-associated gait changes in mice reveals modular organization of locomotor networks. *Curr Biol* 25, 1426-1436.
- Berman, G.J. (2018). Measuring behavior across scales. *BMC Biol* 16, 23.
- Blatt, G.J., and Eisenman, L.M. (1988). Topographic and zonal organization of the olivocerebellar projection in the reeler mutant mouse. *J Comp Neurol* 267.
- Brooks, S.P., and Dunnett, S.B. (2009). Tests to assess motor phenotype in mice: a user's guide. *Nat Rev Neurosci* 10, 519-529.
- Brown, A.E.X., and de Bivort, B. (2018). Ethology as a physical science. *Nat Phys* 14, 653-657.
- Carey, M.R. (2011). Synaptic mechanisms of sensorimotor learning in the cerebellum. *Curr Opin Neurobiol* 21, 609-615.
- Cendelin, J., Voller, J., and Vozech, F. (2010). Ataxic gait analysis in a mouse model of the olivocerebellar degeneration. *Behav Brain Res* 210, 8-15.
- Cendelin, J. (2014). From mice to men: lessons from mutant ataxic mice. *Cerebellum & Ataxias* 1, 4.
- Chen, L., Bao, S., Lockard, J.M., Kim, J.K., and Thompson, R.F. (1996). Impaired classical eyeblink conditioning in cerebellar-lesioned and Purkinje cell degeneration (*pcd*) mutant mice. *J Neurosci* 6.
- Curran, T., and D'Arcangelo, G. (1998). Role of reelin in the control of brain development. *Brain Research Reviews* 26, 285-294.
- D'Arcangelo, G., Homayouni, R., Keshvara, L., Rice, D.S., Sheldon, M., and Curran, T. (1999). Reelin Is a Ligand for Lipoprotein Receptors. *Neuron* 24, 471-479.
- D'Arcangelo, G., Miao, G.G., Chen, S.C., Soares, H.D., Morgan, J.I., and Curran, T. (1995). A protein related to extracellular matrix proteins deleted in the mouse mutant reeler. *Nature* 374.
- Darmohray, D.M., Jacobs, J.R., Marques, H.G., and Carey, M.R. (2019). Spatial and Temporal Locomotor Learning in Mouse Cerebellum. *Neuron* 102, 217-231.e214.
- Datta, S.R., Anderson, D.J., Branson, K., Perona, P., and Leifer, A. (2019). Computational Neuroethology: A Call to Action. *Neuron* 104, 11-24.
- Ebner, T.J., and Pasalar, S. (2008). Cerebellum predicts the future motor state. *Cerebellum* 7, 583-588.
- Falconer, D. (1951). Two new mutants, 'trembler' and 'reeler', with neurological actions in the house mouse (*Mus musculus* L.). *Journal of genetics* 50, 192-205.
- Fernandez-Gonzalez, A., La Spada, A.R., Treadaway, J., Higdon, J.C., Harris, B.S., Sidman, R.L., Morgan, J.I., and Zuo, J. (2002). Purkinje cell degeneration (*pcd*) phenotypes caused by mutations in the axotomy-induced gene, *Nna1*. *Science* 295.

- Fisher, R.A. (1936). THE USE OF MULTIPLE MEASUREMENTS IN TAXONOMIC PROBLEMS. *Annals of Eugenics* 7, 179-188.
- Fortier, P., Smith, A.M., and Rossignol, S. (1987). Locomotor deficits in the cerebellar mutant mouse, Lurcher. *Exp Brain Res* 66.
- Gabriel, A.F., Marcus, M.A.E., Walenkamp, G.H.I.M., and Joosten, E.A.J. (2009). The CatWalk method: Assessment of mechanical allodynia in experimental chronic pain. *Behavioural Brain Research* 198, 477-480
- Goldowitz, D., Cushing, R.C., Laywell, E., D'Arcangelo, G., Sheldon, M., Sweet, H.O., Davisson, M., Steindler, D., and Curran, T. (1997). Cerebellar disorganization characteristic of reeler in scrambler mutant mice despite presence of reelin. *J Neurosci* 17.
- Gorska, T., Zmysłowski, W., and Majczyński, H. (1998). Overground locomotion in intact rats: interlimb coordination, support patterns and support phases duration. *Acta neurobiologiae experimentalis* 59, 131-144.
- Hack, I., Bancila, M., Loulier, K., Carroll, P., and Cremer, H. (2002). Reelin is a detachment signal in tangential chain-migration during postnatal neurogenesis. *Nature Neuroscience* 5, 939-945.
- Hamburgh, M. (1963). Analysis of the postnatal developmental effects of "reeler," a neurological mutation in mice. A study in developmental genetics. *Dev Biol* 8.
- Hoogland, T.M., De Gruijl, J.R., Witter, L., Canto, C.B., and De Zeeuw, C.I. (2015). Role of Synchronous Activation of Cerebellar Purkinje Cell Ensembles in Multi-joint Movement Control. *Curr Biol* 25, 1157-1165.
- Ito, M. (2008). Control of mental activities by internal models in the cerebellum. *Nat Rev Neurosci* 9, 304-313.
- James, G., Witten, D., Hastie, T., and Tibshirani, R. (2013). *An Introduction to Statistical Learning: with Applications in R* (Springer, New York, NY).
- Kang, W.Y., Kim, S.S., Cho, S.K., Kim, S., Suh-Kim, H., and Lee, Y.D. (2010). Migratory defect of mesencephalic dopaminergic neurons in developing reeler mice. *Anat Cell Biol* 43.
- Kennedy, A., Wayne, G., Kaifosh, P., Alviña, K., Abbott, L.F., and Sawtell, N.B. (2014). A temporal basis for predicting the sensory consequences of motor commands in an electric fish. *Nat Neurosci* 17, 416-422.
- Kiehn, O. (2016). Decoding the organization of spinal circuits that control locomotion. *Nature Reviews Neuroscience*
- Lalonde, R., Hayzoun, K., Derer, M., Mariani, J., and Strazielle, C. (2004). Neurobehavioral evaluation of ReIn-rl-ori mutant mice and correlations with cytochrome oxidase activity. *Neurosci Res* 49.
- Lalonde, R., and Strazielle, C. (2007). Spontaneous and induced mouse mutations with cerebellar dysfunctions: behavior and neurochemistry. *Brain Res* 1140, 51-74.
- Lalonde, R., and Strazielle, C. (2019). Motor Performances of Spontaneous and Genetically Modified Mutants with Cerebellar Atrophy. *Cerebellum* 18, 615-634.
- Le Marec, N., and Lalonde, R. (1997). Sensorimotor learning and retention during equilibrium tests in Purkinje cell degeneration mutant mice. *Brain Res* 768, 310-316.
- Machado, A.S., Darmohray, D.M., Fayad, J., Marques, H.G., and Carey, M.R. (2015). A quantitative framework for whole-body coordination reveals specific deficits in freely walking ataxic mice. *Elife* 4.
- Machado et al., 2015; <https://github.com/careylab/ LocoMouse>.
- Mikoshiba, K., Kohsaka, S., Takamatsu, K., Aoki, E., and Tsukada, Y. (1980). Morphological and biochemical studies on the cerebral cortex from reeler mutant mice: development of cortical layers and metabolic mapping by the deoxyglucose method. *J Neurochem* 34.
- Morton, S.M., and Bastian, A.J. (2006). Cerebellar contributions to locomotor adaptations during splitbelt treadmill walking. *Journal of Neuroscience* 26, 9107-9116.
- Morton, S.M., and Bastian, A.J. (2007). Mechanisms of cerebellar gait ataxia. *The Cerebellum* 6, 79-86.
- Mullen, R.J., Eicher, E.M., and Sidman, R.L. (1976). Purkinje cell degeneration, a new neurological mutation in the mouse. *Proceedings of the National Academy of Sciences* 73, 208-212.
- Orlovsky, G.N., Deliagina, T.G., Grillner, S., and Orlovskii, G.N. (1999). Neuronal control of locomotion: from mollusc to man.
- Powell, K., Mathy, A., Duguid, I., and Häusser, M. (2015). Synaptic representation of locomotion in single cerebellar granule cells. *Elife* 4.

- Reisman, D.S., Block, H.J., Bastian, A.J., and J (2005). Interlimb coordination during locomotion: what can be adapted and stored? *94*, 2403-2415.
- Shadmehr, R., and Krakauer, J.W. (2008). A computational neuroanatomy for motor control. *Experimental Brain Research* 185, 359-381.
- Sarnaik, R., and Raman, I.M. (2018). Control of voluntary and optogenetically perturbed locomotion by spike rate and timing of neurons of the mouse cerebellar nuclei. *Elife* 7.
- Schiffmann, S.N., Cheron, G., Lohof, A., d'Alcantara, P., Meyer, M., Parmentier, M., and Schurmans, S. (1999). Impaired motor coordination and Purkinje cell excitability in mice lacking calretinin. *Proc Natl Acad Sci U S A* 96.
- Stanfield, B.B., Caviness, V.S., and Cowan, W.M. (1979). The organization of certain afferents to the hippocampus and dentate gyrus in normal and reeler mice. *J Comp Neurol* 185.
- Stroobants, S., Gantois, I., Pooters, T., and D'Hooge, R. (2013). Increased gait variability in mice with small cerebellar cortex lesions and normal rotarod performance. *Behav Brain Res* 241, 32-37.
- Terashima, T., Inoue, K., Inoue, Y., Mikoshiba, K., and Tsukada, Y. (1983). Distribution and morphology of corticospinal tract neurons in reeler mouse cortex by the retrograde HRP method. *J Comp Neurol* 218.
- Thach, W.T., Goodkin, H.P., and Keating, J.G. (1992). The cerebellum and the adaptive coordination of movement. *Annu Rev Neurosci* 15, 403-442.
- Udo, M., Matsukawa, K., Kamei, H., and Oda, Y. (2003). Cerebellar control of locomotion: effects of cooling cerebellar intermediate cortex in high decerebrate and awake walking cats. *JNeurophysiol* 44, 119-134.
- Van Alphen, A.M., Schepers, T., Luo, C., and De Zeeuw, C.I. (2002). Motor performance and motor learning in Lurcher mice. *Ann N Y Acad Sci* 978.
- Vinueza, W., Negrello, M., Seepers, R.M., Strydis, C., Koekkoek, S.K.E., Veloz, M.F., Zhou, K., Bosman, L.W.J., Potters, J., and Zeeuw, C.I. (2014). Cerebellar control of gait and interlimb coordination. *Brain Struct Funct*.
- Walter, J.T., Alvina, K., Womack, M.D., Chevez, C., and Khodakhah, K. (2006). Decreases in the precision of Purkinje cell pacemaking cause cerebellar dysfunction and ataxia. *Nat Neurosci* 9, 389-397.
- Wolpert, D.M., Miall, R.C., and Kawato, M. (1998). *Internal models in the cerebellum*, Vol 2
- Zörner, B., Filli, L., Starkey, M.L., Gonzenbach, R., Kasper, H., Röthlisberger, M., Bolliger, M., and Schwab, M.E. (2010). Profiling locomotor recovery: comprehensive quantification of impairments after CNS damage in rodents. *Nat Meth* 7, 701-708.

# Figure 1

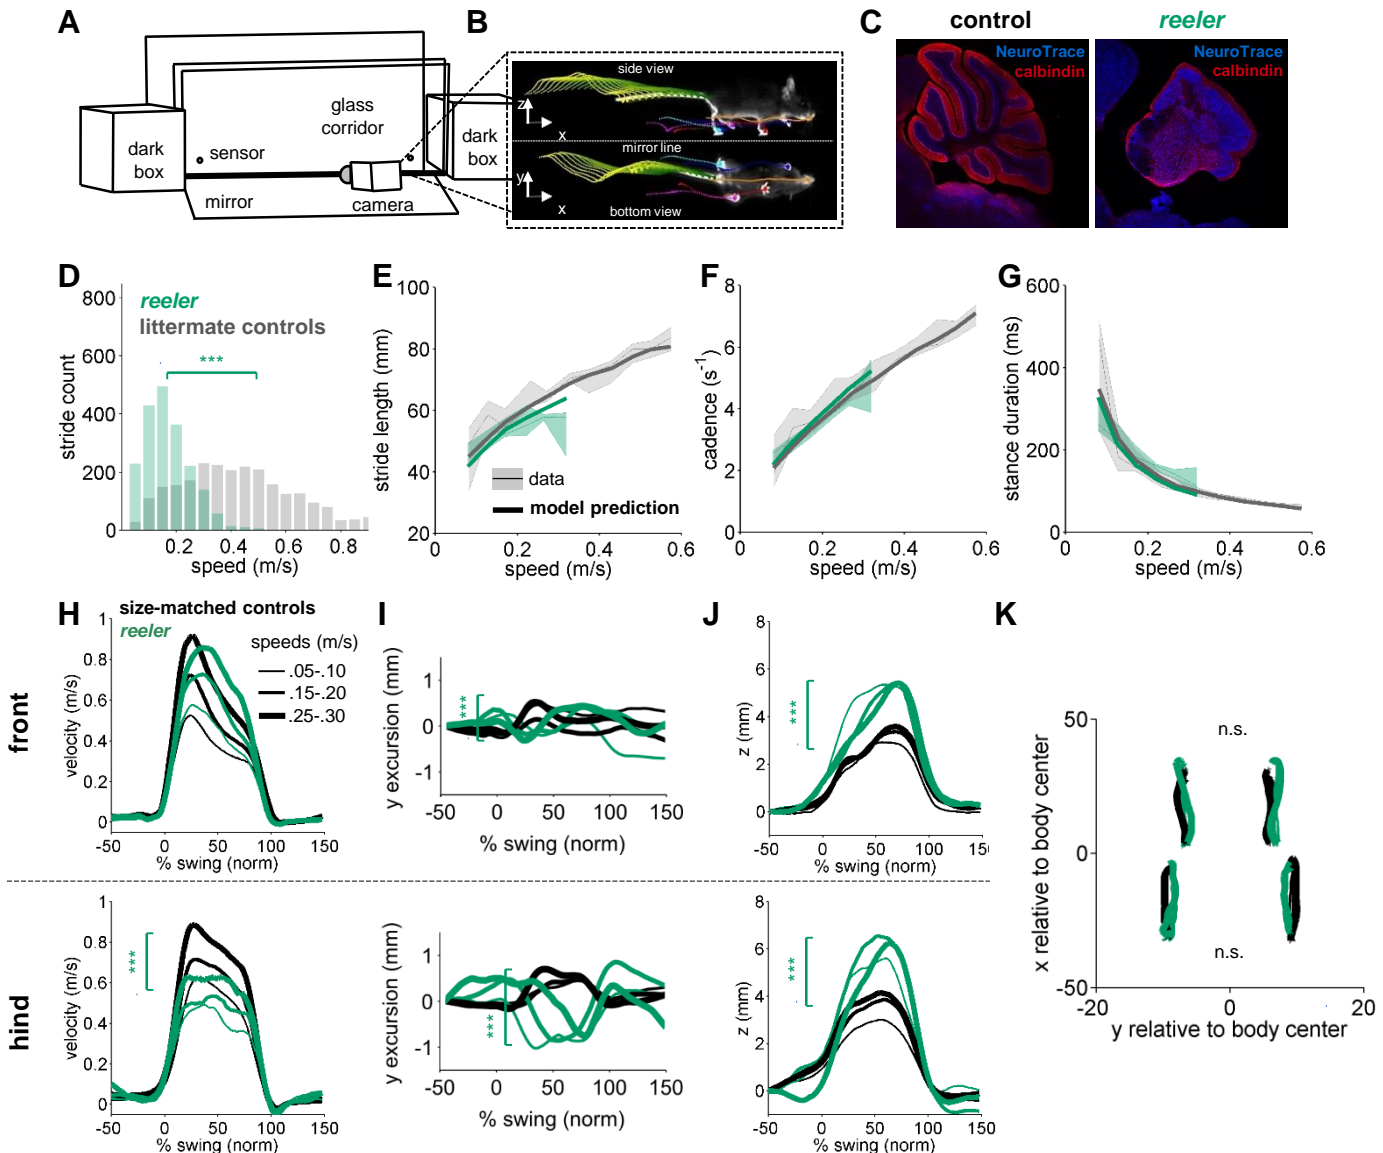

**Figure 1: Intact forward motion of front paws, altered 3D paw trajectories, and impaired hindlimb control in *reeler***

**(A)** Schematic of the LocoMouse setup with two dark boxes, glass corridor, motion sensors, high speed (400fps) camera, and mirror. Mice freely cross the corridor. **(B)** An example of side and bottom views captured in a single via mirror reflection. Continuous tracks (in x, y, z) for nose, paws and tail segments obtained from LocoMouse tracking are plotted on top of the frame. **(C)** Sagittal sections of mouse cerebellum from littermate control (left) and a *reeler* mouse (right) illustrate dramatic cerebellar reorganization in *reeler*. **(D)** Histogram of walking speeds for *reeler* (green N=7 mice, n=2439) and littermate controls (grey, N=12, n=2515). Walking speed distributions are significantly different, *reelers* mice walk slower (ind. t-test  $p < 0.001^{***}$ ). **(E-G)** Stride length **(E)**, cadence **(F, 1/ stride duration)** and stance duration **(G)** of the front right (FR) paw vs walking speed for *reeler* (green) and littermates (grey). For each parameter, thin lines with shadows represent median values  $\pm 25^{\text{th}}$ ,  $75^{\text{th}}$  percentiles. Thick lines represent the predictions calculated using the equations previously derived from the mixed-effect models described in (Machado et al., 2015). No significant difference was observed between littermate controls and *reeler* mice (main effects: stride length:  $F_{1,90}=2.16$ ,  $p=0.14$ ; cadence:  $F_{1,90}=0.7$ ,  $p=0.4$ ; stance duration:  $F_{1,90}=2.97$ ,  $p=0.09$ ). **(H)** Average instantaneous forward (x) velocity of FR paw (top) and hind right (HR) paw (bottom), normalized to the swing phase. Line thickness represents increasing speed. *Reeler* (green), size-matched controls (black; N=11; n=3412). *Reeler* mice showed sig. higher avg. swing velocity ( $F_{1,104}=4.59$ ,  $p=0.03$ ), but no difference in peak inst. velocity ( $F_{1,104}=0.87$ ,  $p=0.35$ ). Hind paws showed lower peak velocity than size-matched controls ( $F_{1,103}=14.1$ ,  $p < 0.0001$ ). **(I)** side-to-side (y)-excursion for FR and HR paws, relative to body midline. There are changes in peak to peak trajectories for both paws (FR:  $F_{1,96}=197.4$ ,  $p < 0.0001$ ; HR:  $F_{1,103}=353.9$ ,  $p < 0.0001$ ). **(J)** Average vertical (z) position of FR paw (top) and HR paw (bottom) relative to ground during swing. *Reelers* mice have larger vertical movement than size-matched controls (FR:  $F_{1,96}=205.5$ ,  $p < 0.0001$ ; HR:  $F_{1,103}=11.9$ ,  $p < 0.0001$ ). **(K)** x-y position of four paws relative to the body center during swing for *reeler* and size-matched controls. There was no significant difference in width of base of support ( $F_{1,101}=2.4$ ,  $p=0.12$ ).

## Fig. 1 – Supp. 1

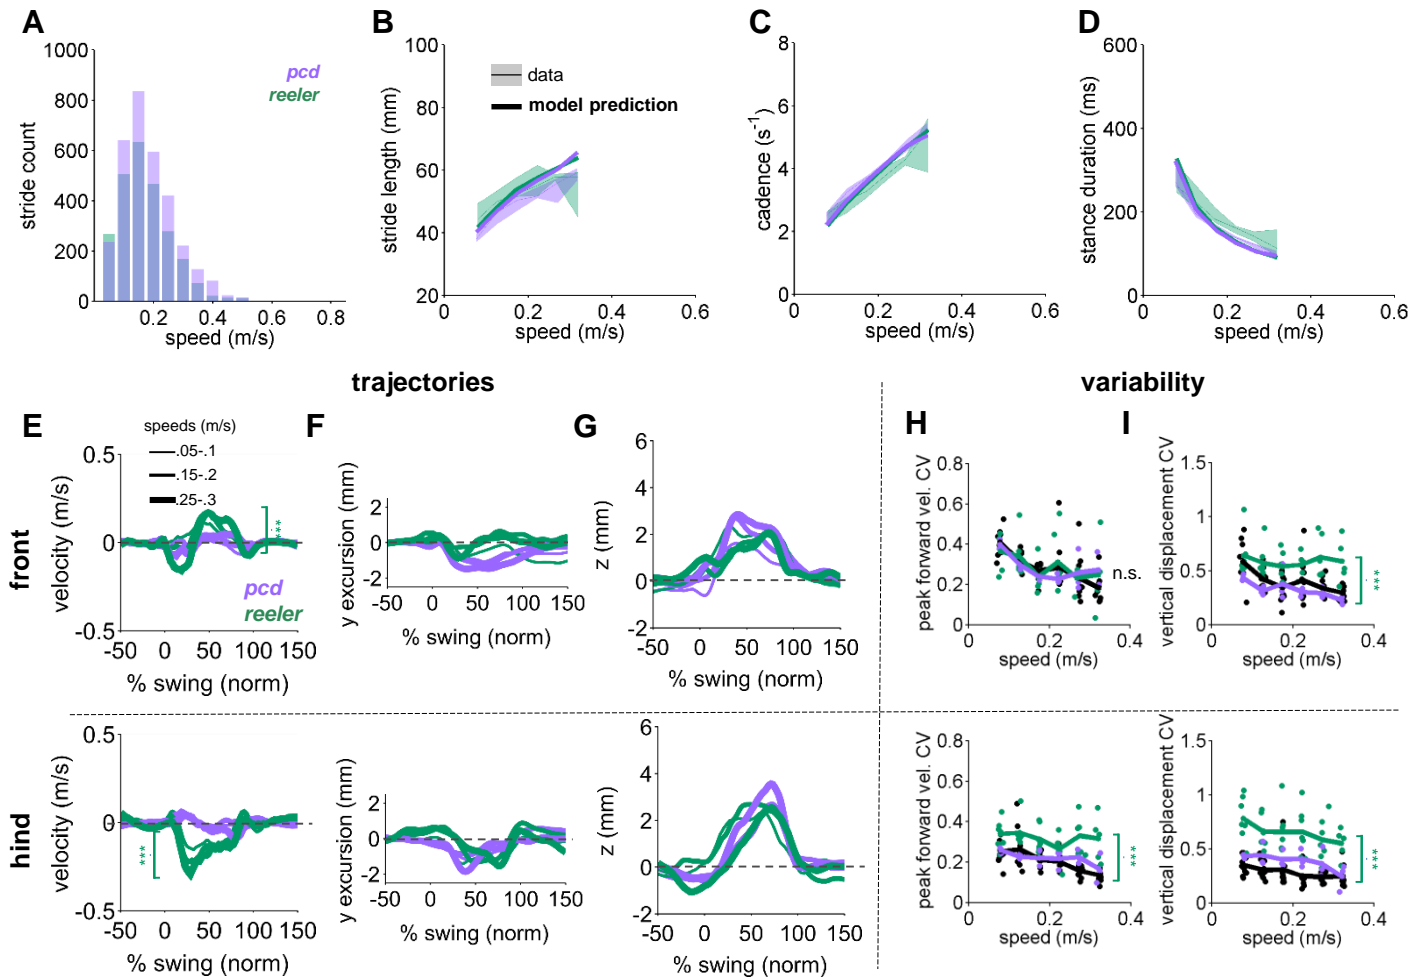

**Figure 1 Supplement 1: Comparison of *Reeler* and *pcd* mice reveals overall similarity of averaged paw trajectories, with additional hind limb impairments and increased variability in *reeler*.**

**(A)** Histogram of walking speeds, for *reeler* (green N=7; n=2439) and *pcd* (purple, N=3; n=3052; Machado et al., 2015). **(B-D)** Stride length **(B)**, cadence **(C)**, 1/ stride duration) and stance duration **(D)** vs walking speed for *reeler* (green) and *pcd* (purple) mice. For each parameter, the thin lines with shadows represent median values  $\pm$  25<sup>th</sup>, 75<sup>th</sup> percentiles. Thick lines represent the predictions calculated based on the models derived in (Machado et al., 2015). *Reeler* mice had sig. higher stride lengths ( $F_{1,52}=5.23$ ,  $p=0.03$ ). No significant differences were observed between *pcd* and *reeler* in cadence:  $F_{1,55}=0.01$ ,  $p=0.92$  or stance duration:  $F_{1,52}=0.19$ ,  $p=0.66$ . **(E-G)** The differences in averaged trajectories between each mutant size and speed-matched controls are plotted for *reeler* (green) and *pcd* (purple). Line thicknesses represent increasing walking speed. **(E)** The peak instantaneous forward (x) velocity of FR paws (top) was sig. higher in *reeler* ( $F_{1,8}=50.23$ ,  $p<0.0001$ ). Peak HR paw velocity is lower in *reeler* (bottom,  $F_{1,8}=6.09$ ,  $p<0.0001$ ). **(F)** Differences in side-to-side (y)-excursion for FR (top) and HR (bottom) paws during swing phase, relative to body midline. No significant difference is observed in peak excursion between *pcd* and *reeler* (FR:  $F_{1,8}=4.81$ ,  $p=0.06$ ; HR:  $F_{1,8}=0.04$ ,  $p=0.84$ ). **(G)** Differences in vertical (z) trajectory of FR paw (top) and HR paw (bottom) during swing phase. No significant difference in peak z was observed between *pcd* and *reeler* mice (FR:  $F_{1,8}=0.91$ ,  $p=0.37$ ; HR:  $F_{1,8}=1.98$ ,  $p=0.2$ ). **(H,I)** Coefficient of variation (CV) for peak forward velocity **(H)** and vertical displacement **(I)** for size-matched controls, *reeler*, and *pcd*. Hind paw velocity **(H)**, bottom;  $F_{1,99}=13$ ,  $p<0.0001$ ) and both front **(I)**, top;  $F_{1,101}=45.1$ ,  $p<0.0001$ ) and hind **(I)**, bottom;  $F_{1,101}=73.3$ ,  $p<0.0001$ ) paw vertical movements were more variable in *reeler*.

## Figure 2

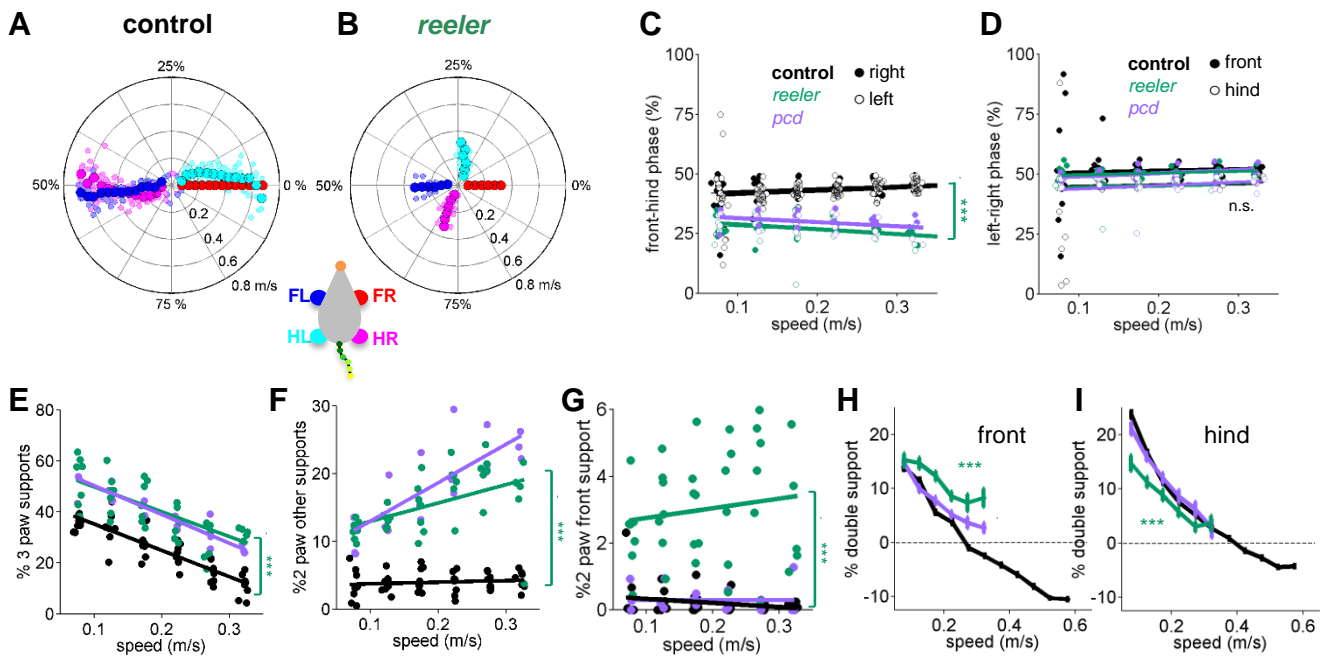

**Figure 2: Impaired front-hind limb coordination and increased front paw support patterns in *reeler*.**

(A-B) Polar plots indicating the phase of the step cycle in which each limb enters stance, aligned to stance onset of FR paw (red). Radial axis represents walking speed. Limbs are color coded according to the inset; large symbols represent averages across animals and small symbols represent individual mice. (A) size-matched control mice (N=11) and (B) *reeler* mice (N=7). (C,D) Relative front-hind (C) and left-right (D) stance phases across walking speeds for *pcd* (purple), *reeler* (green) and size-matched controls (black). Each circle represents one animal. Lines show fit of linear-mixed effects model for each variable. Only front-hind phase is impaired in *reeler* and *pcd* mice (front-hind phase:  $F_{1,104}=11.7$ ,  $p<0.0001$ ; left-right phase:  $F_{1,104}=0.7$ ,  $p=0.41$ ). (E) Both *pcd* and *reeler* have a higher percentage of 3 paw supports at all speeds ( $F_{1,104}=115.1$ ,  $p<0.0001$ ). (F) Non-diagonal 2-paw support configurations are increased in both *pcd* and *reeler* ( $F_{1,104}=28.3$ ,  $p<0.0001$ ). (G) Only *reeler* mice show an increase in 2-front paw support configurations ( $F_{1,101}=207$ ,  $p<0.0001$ ). (H,I) Average  $\pm$ s.e.m. percent front- and hind-paw double support for front (H) and hind (I) paws of *pcd* (purple), *reelers* (green) and size-matched controls (black). *Reeler* mice have a higher % of front double support and lower % of hind double support when compared with size-matched controls (front double support:  $F_{1,99}=71.9$ ,  $p<0.0001$ ; hind double support:  $F_{1,103}=27.2$ ,  $p<0.0001$ ).



## Figure 3

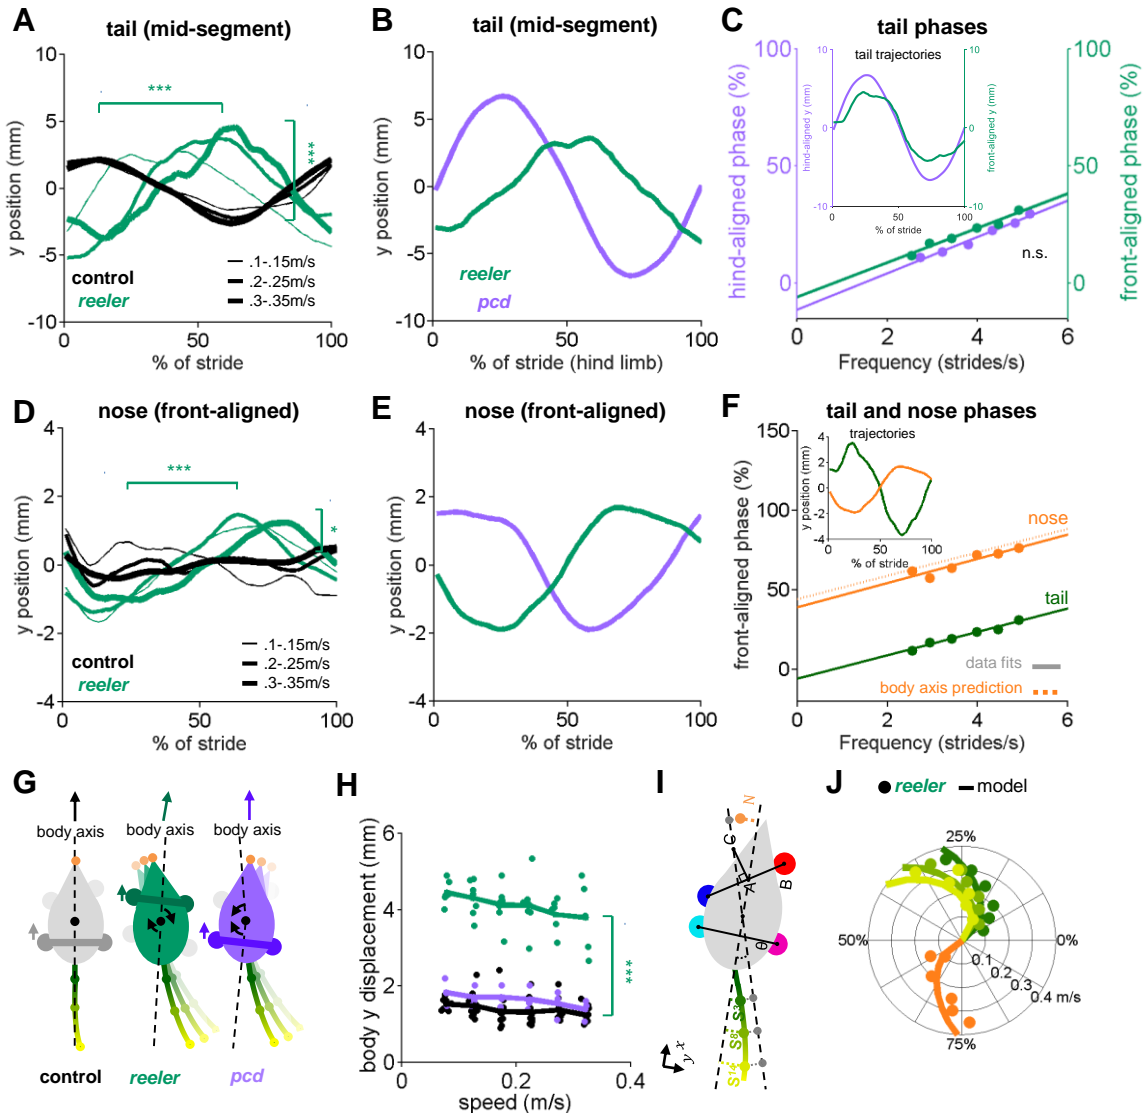

**Figure 3. Tail and nose movements of *reeler* mice can be modeled as a passive consequence of the forward movement of the front paws.**

(A) Compared to controls (black), *reelers* (green) display larger averaged side-to-side tail oscillations, and increased phase lags with increased walking speed (from thin to thick lines) (tail amplitude:  $F_{1,103}=24.8$ ,  $p<0.0001$ ; tail phase:  $F_{1,104}=59.2$ ,  $p<0.0001$ ). (B) Different phase relationships of *reeler* (green) and *pcd* (purple) tail oscillations relative to the hind limb stride cycle (walking speed 0.25-0.3m/s). (C) When aligned to the front limbs, *reeler* (green) tail phases are very close to those of *pcd* (purple) aligned to the hind limbs (lines show fits to the data;  $F_{1,56}=1.3$ ,  $p=0.26$ ). Inset shows the tail trajectories of *reelers* aligned to the front paws (green) and *pcd* (purple) aligned to the hind limbs (mid-tail segment for animals walking at 0.25-0.3m/s). (D) *Reelers* also show larger nose oscillations and phase-lags that increase with speed increases when compared with controls (amplitude:  $F_{1,104}=5.1$ ,  $p=0.03$ ; phase:  $F_{1,104}=42.1$ ,  $p<0.0001$ ). (E) Different phases of *reeler* nose (green) and *pcd* (purple), aligned to front paws. (F) The *reeler* nose (orange) is nearly perfectly out of phase with the base of the tail (green), suggesting oscillation of a single body axis (circles represent data points, solid lines show fits to the data, dashed line shows a prediction of the nose phases with respect to the same body axis as the tail. Inset shows the trajectories of the base of the tail and nose aligned to front limbs). (G) Interpretation of tail and nose movements observed in control (left), *reeler* (middle) and *pcd* (right) mice. (H) Average side-to-side (y)-excursion of the body center during strides ( $F_{1,99}=1072.5$ ,  $p<0.0001$ ). (I) Geometric interpretation of the analytical model (see Methods). The forward movement of front limbs (AB) is transformed into lateral oscillations of a body axis (AC). The lateral oscillations of tail and nose are then given by a time delay relative to the movement of the body axis. (J) Phase (relative to front limb oscillation) of nose (orange), base of the tail (dark green), mid-tail segment (intermediate green) and tip of the tail (light green), plotted as a function of walking speed. Circles represent data, lines are the predictions of the analytical model.

## Fig. 3 – Supp.1

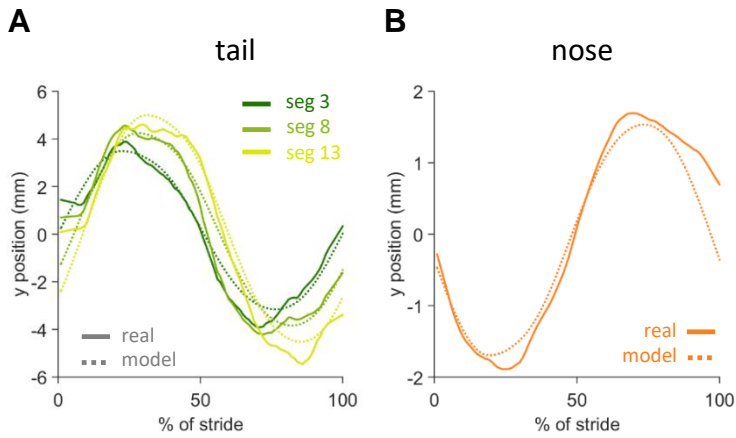

**Figure 3 Supplement 1. Real and modelled trajectories of *reeler* tail and nose.**

**(A)** Real trajectories of tail segments 3, 8 and 13 of *reeler* mice (solid lines) aligned to the front limb, and the corresponding modelled trajectories (dashed lines). **(B)** Real trajectories of *reeler* nose (solid lines), and the corresponding modelled trajectories (dashed lines).

## Figure 4

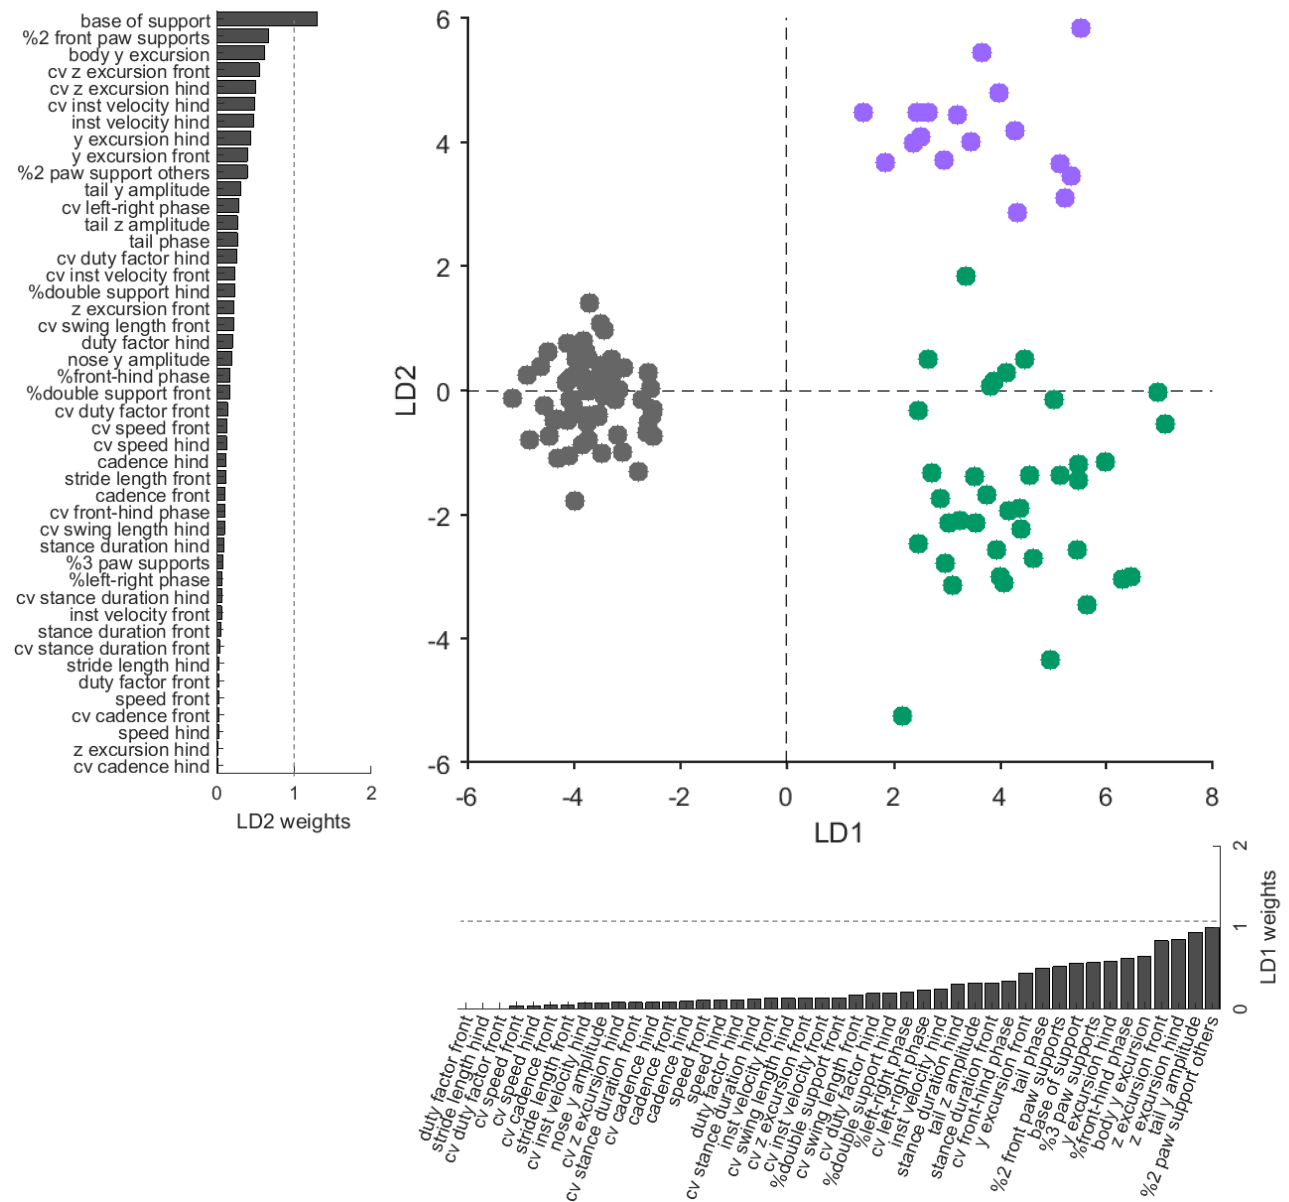

**Figure 4: Linear discriminant analysis separates ataxic mutants and reveals shared and distinct features of gait ataxia.**

Linear discriminant analysis of locomotor kinematics reveals two axes, which separate ataxic mutants from controls (LD1) and from each other (LD2). Each dot represents a single animal walking at a particular speed. Size and speed-matched controls are in grey (N=11, n~3288), *reeler* in green (N=7, n~2387), and *pcd* in purple (N=3, n~3066). Speeds range from 0.05 – 0.35 m/s. The bars along each axis are ranked by the contribution scores (LD coefficients) of each variable to that axis (larger bars indicate higher contributions). Features contributing strongly to LD1 include interlimb and whole-body coordination, as well as off-axis paw trajectories. For LD2, they also include variability, front paw supports, and relative phasing of tail/nose movements.

# Fig. 4 – Supp. 1

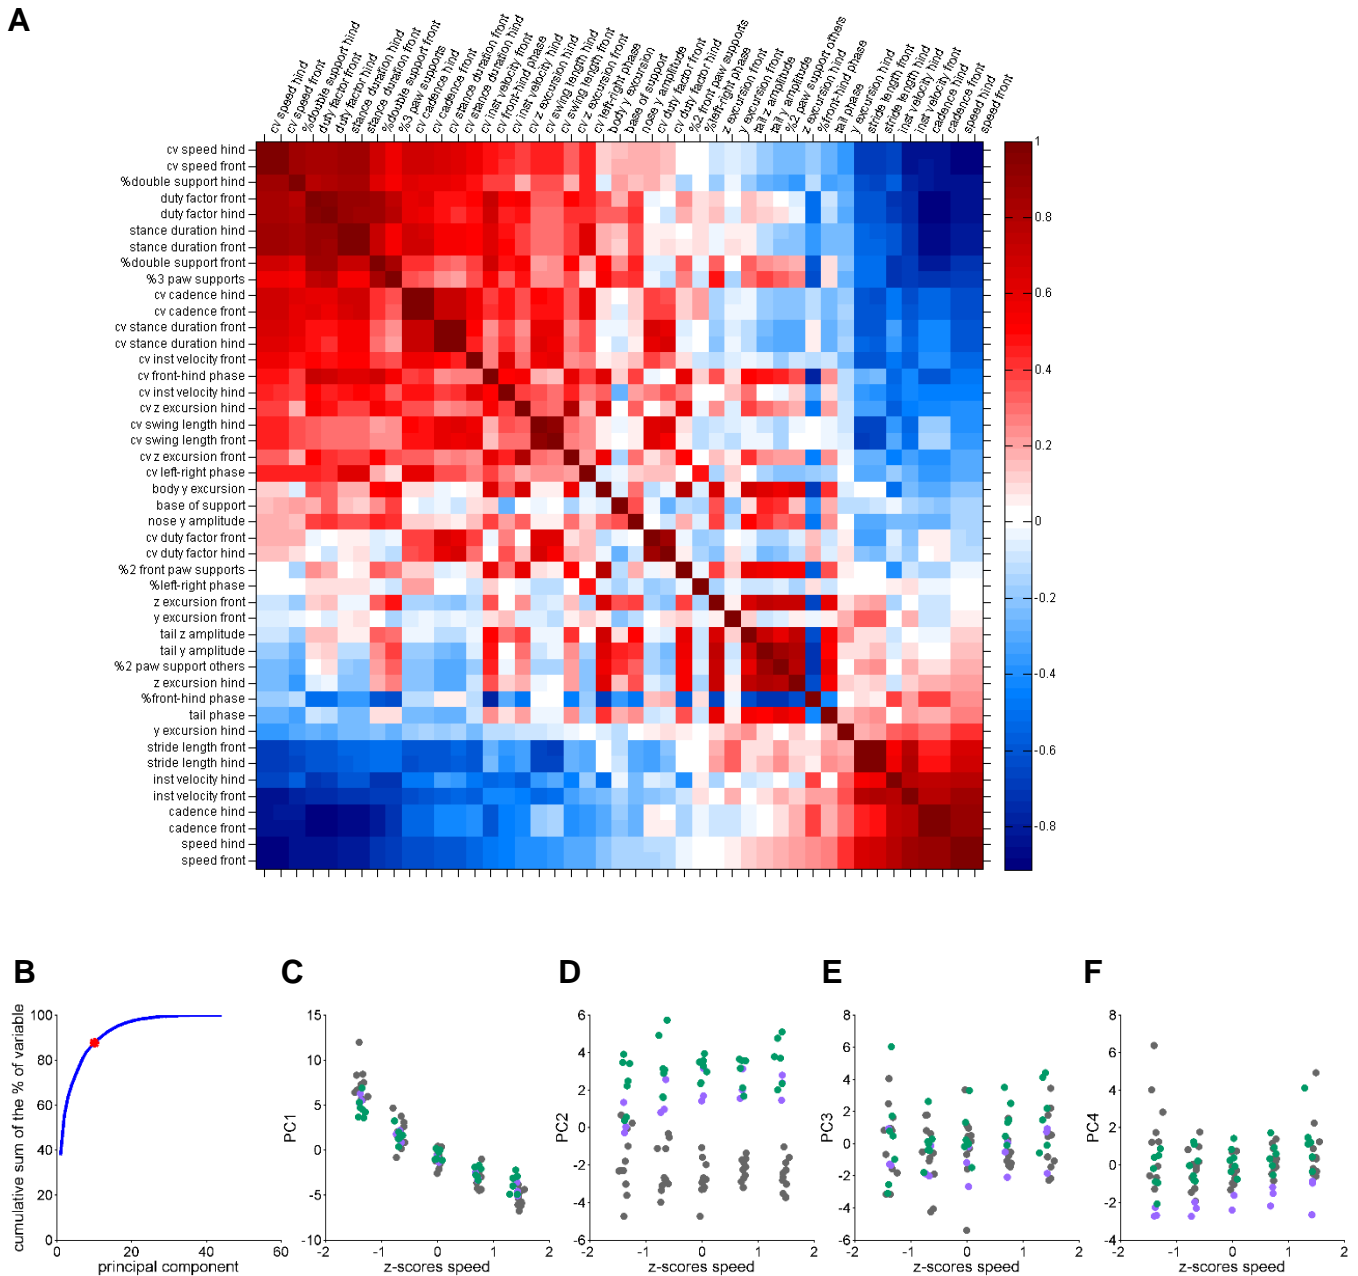

**Figure 4 Supplement 1: Data correlations and variance analysis for inputs to LDA.**

**(A)** Correlation matrix: correlation coefficients between gait variables. **(B)** Cumulative explained variance of each principal component. Red dot indicates the selection of the first 10 principal components that explain approx. 88 % of the variance. **(C-F)** The first 4 principal component scores plotted against z-scored speed bins. Each dot represents a single animal walking at a particular speed, for controls (grey; N=11), *reeler* (green; N=7), and *pcd* (purple; N=3). Speed is faithfully captured by the first principal component **(C)**, which largely accounts for the high correlation values in **(A)**; Machado, Darmohray et al. 2015).
